# Supplementary material for: miRge 2.0 for comprehensive analysis of microRNA sequencing data
Source: Springer Nature journal article supplement (doi:10.1186/s12859-018-2287-y), 2018-07-23
Supplement: 12859_2018_2287_MOESM2_ESM.pdf [file 12859_2018_2287_MOESM2_ESM.pdf]

**Supplemental Table 1.** Features calculated for building the novel miRNA detection model.

| Feature                                                                                                                                                                                    |
|--------------------------------------------------------------------------------------------------------------------------------------------------------------------------------------------|
| Sequence count in the cluster                                                                                                                                                              |
| Read count                                                                                                                                                                                 |
| The proportion of reads that are an exact match to the cluster sequence in the cluster                                                                                                     |
| 5' Unstable length of the cluster                                                                                                                                                          |
| 3' Unstable length of the cluster                                                                                                                                                          |
| Proportion of templated nucleotide at the positions -3, -2, -1 relative to the 5' end and +1, +2, +3, +4, +5, +6 relative to the 3' end of the stable range of the cluster sequences       |
| Proportion of non-templated adenine (A) at the positions -3, -2, -1 relative to the 5' end and +1, +2, +3, +4, +5, +6 relative to the 3' end of the stable range of the cluster sequences  |
| Proportion of non-templated thymine (T) at the positions -3, -2, -1 relative to the 5' end and +1, +2, +3, +4, +5, +6 relative to the 3' end of the stable range of the cluster sequences  |
| Proportion of non-templated cytosine (C) at the positions -3, -2, -1 relative to the 5' end and +1, +2, +3, +4, +5, +6 relative to the 3' end of the stable range of the cluster sequences |
| Proportion of non-templated guanine (G) at the positions -3, -2, -1 relative to the 5' end and +1, +2, +3, +4, +5, +6 relative to the 3' end of the stable range of the cluster sequences  |
| The arm where the stable range of sequences were located at the precursor hairpin structure                                                                                                |
| Distance between stable range of sequences and terminal loop                                                                                                                               |
| Number of bindings in the stable range of sequences divided by its length                                                                                                                  |
| Number of hairpin loops in the precursor                                                                                                                                                   |
| Number of bindings in the precursor                                                                                                                                                        |
| Number of interior loops in the precursor                                                                                                                                                  |
| Number of nucleotides in apical loop of the precursor                                                                                                                                      |
| Length of stem in the precursor                                                                                                                                                            |
| Minimum free energy (MFE) of the precursor                                                                                                                                                 |
| Number of bindings in the stable range of sequences                                                                                                                                        |
| Whether UGU or UGUG motif exists in the apical loop of the precursor                                                                                                                       |
| Whether there is another stable range of sequences located at the other arm of the precursor                                                                                               |
