# Supplementary material for: miRge 2.0 for comprehensive analysis of microRNA sequencing data
Source: Springer Nature journal article supplement (doi:10.1186/s12859-018-2287-y), 2018-07-23
Supplement: 12859_2018_2287_MOESM4_ESM.pdf [file 12859_2018_2287_MOESM4_ESM.pdf]

**Supplemental Table 2.** 12 rat samples for evaluating the human and mouse novel miRNA predictive models.

| Tissue Type | Sequence Read Archive (SRA) References |
|-------------|----------------------------------------|
| Lung        | SRR3498192, SRR3498196, SRR3498182     |
| Liver       | SRR3498150, SRR3498148, SRR3498148     |
| Kidney      | SRR3498125, SRR3498118, SRR3498130     |
| Heart       | SRR3498075, SRR3498102, SRR3498103     |
