# Supplementary material for: miRge 2.0 for comprehensive analysis of microRNA sequencing data
Source: Springer Nature journal article supplement (doi:10.1186/s12859-018-2287-y), 2018-07-23
Supplement: 12859_2018_2287_MOESM6_ESM.pdf [file 12859_2018_2287_MOESM6_ESM.pdf]

**Supplemental Table 4.** Top 12 features in the mouse novel miRNA predictive model. Hairpin structural features are labeled in bold/italics, while read compositional features are not.

| Rank | Feature name                           | Description of the feature                                                               |
|------|----------------------------------------|------------------------------------------------------------------------------------------|
| 1    | <b><i>count_bindings_in_miRNA</i></b>  | Number of bindings in the stable range of sequences                                      |
| 2    | <b><i>pair_state_No</i></b>            | Whether there is another stable range of sequences located at the other arm of precursor |
| 3    | <b><i>mFE</i></b>                      | Minimum free energy (MFE) of the precursor                                               |
| 4    | <b><i>hairpin_count</i></b>            | Number of hairpin loops in the precursor                                                 |
| 5    | <b><i>distanceToloop</i></b>           | Distance between the stable range of sequences and the terminal loop                     |
| 6    | <b><i>stem_length</i></b>              | Stem length of the precursor                                                             |
| 7    | exactMatchRatio                        | The proportion of reads that are an exact match to the cluster sequence in the cluster   |
| 8    | headUnstableLength                     | 5' unstable length of the cluster                                                        |
| 9    | <b><i>percentage_PairedInMiRNA</i></b> | Number of bindings in the stable range of sequences divided by its length                |
| 10   | <b><i>pair_state_Yes</i></b>           | Whether there is another stable range of sequences located at the other arm of precursor |
| 11   | <b><i>binding_count</i></b>            | Number of bindings in the precursor hairpin                                              |
| 12   | <b><i>interiorLoopCount</i></b>        | Number of interior loops in the precursor                                                |
