# Supplementary material for: miRge 2.0 for comprehensive analysis of microRNA sequencing data
Source: Springer Nature journal article supplement (doi:10.1186/s12859-018-2287-y), 2018-07-23
Supplement: 12859_2018_2287_MOESM7_ESM.pdf [file 12859_2018_2287_MOESM7_ESM.pdf]

**Supplemental Table 5.** Predictive results for 19 mouse RNA-seq datasets for novel miRNA detection.

| Cell Type          | SRA Reference | AUC   | Precision | Recall | MCC   |
|--------------------|---------------|-------|-----------|--------|-------|
| Smooth muscle cell | DRR041741     | 0.976 | 0.996     | 0.926  | 0.921 |
| Erythroblast       | DRR041759     | 0.976 | 1         | 0.917  | 0.926 |
| Erythroblast       | DRR041761     | 0.978 | 0.996     | 0.918  | 0.922 |
| Erythroblast       | DRR041762     | 0.977 | 0.996     | 0.916  | 0.929 |
| Erythroblast       | DRR041764     | 0.974 | 1         | 0.909  | 0.924 |
| Erythroblast       | DRR041765     | 0.976 | 0.991     | 0.909  | 0.922 |
| Erythroblast       | DRR041767     | 0.98  | 0.996     | 0.906  | 0.922 |
| Erythroblast       | DRR041768     | 0.972 | 0.995     | 0.902  | 0.912 |
| Erythroblast       | DRR041770     | 0.977 | 0.986     | 0.896  | 0.898 |
| Embryo E17.5       | DRR041745     | 0.991 | 0.996     | 0.958  | 0.957 |
| Embryo E17.5       | DRR041751     | 0.989 | 0.995     | 0.956  | 0.948 |
| Embryo E12         | DRR041771     | 0.983 | 0.988     | 0.937  | 0.939 |
| Embryo E12         | DRR041773     | 0.982 | 0.99      | 0.935  | 0.931 |
| Embryo E15         | DRR041774     | 0.984 | 0.992     | 0.926  | 0.93  |
| Embryo E15         | DRR041775     | 0.981 | 0.992     | 0.926  | 0.918 |
| Embryo E18         | DRR041777     | 0.982 | 0.985     | 0.933  | 0.939 |
| Embryo E18         | DRR041779     | 0.971 | 0.98      | 0.922  | 0.927 |
| Neonate N09        | DRR041780     | 0.982 | 0.995     | 0.947  | 0.951 |
| Neonate N09        | DRR041782     | 0.974 | 0.977     | 0.925  | 0.923 |
| Mean               |               | 0.979 | 0.992     | 0.924  | 0.928 |
| Std dev            |               | 0.005 | 0.006     | 0.017  | 0.014 |
